# Supplementary material
Source: PubMed Central journal article supplement (PMC4028341)
Supplement: auto-9-1965-s01.pdf [file auto-9-1965-s01.pdf]

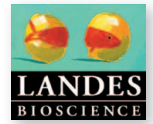

## **Supplemental Material to:**

**Hui Zhang, Fan Wu, Xingwei Wang, Hongwei Du,  
Xiaochen Wang, Hong Zhang**

**The two *C. elegans* ATG-16 homologs have partially  
redundant functions in the basal autophagy pathway**

**Autophagy 2013; 9(12)**

**<http://dx.doi.org/10.4161/auto.26095>**

**[www.landesbioscience.com/journals/autophagy/article/26095](http://www.landesbioscience.com/journals/autophagy/article/26095)**

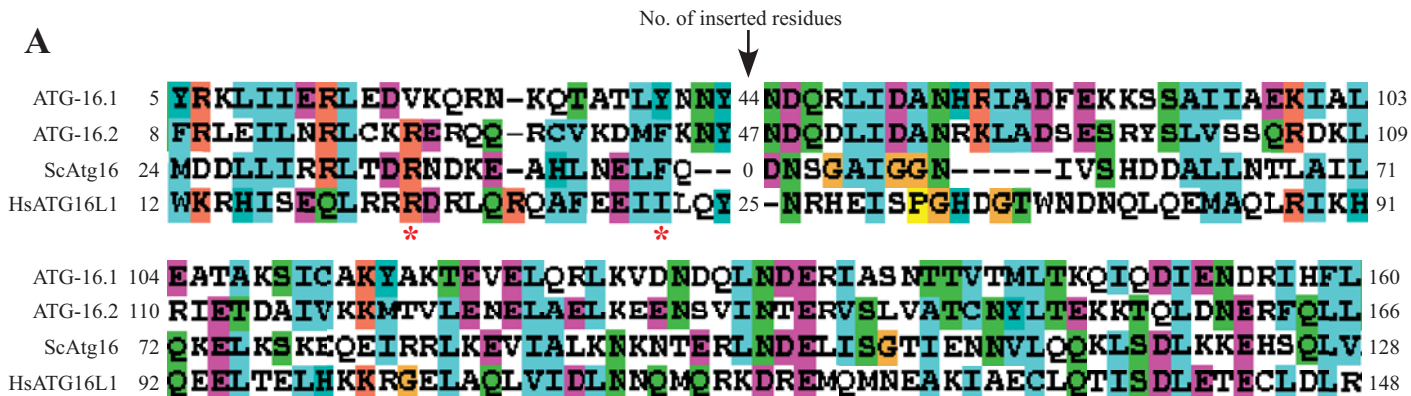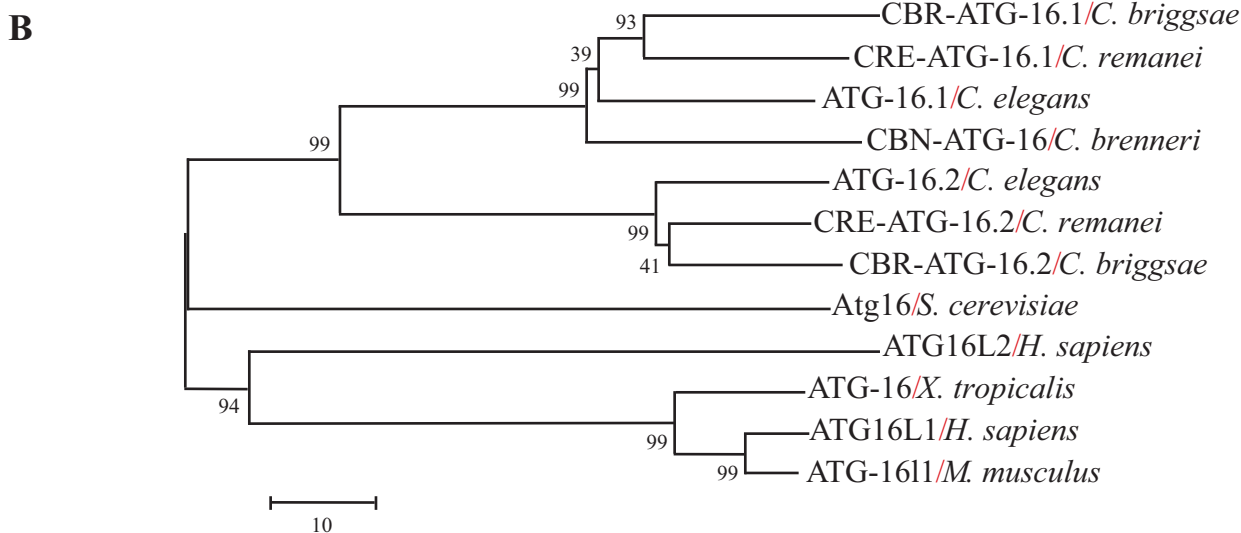

Supplemental Figure S1

**A**

ATG-16.1 304 **SNDKNVRIWNL** **DN** **SRL** **LS** **TLS** **SGHS** **DQVT** **CVK** **FYQ** **SHS** - **AVSGSADRVIKIWDI** 355  
 ATG-16.2 309 **SNDK** **TCRLWN** **IDS** **QRLL** **STF** **SGHT** **DKVSS** **ARLF** **QSHN** - **VISGSADRTIKNWDI** 360  
 HsATG16L1 366 **SND** **FASRI** **WTVDDY** **RLR** **H** **TL** **T** **GHS** **GKVL** **SAK** **FL** **LDNAR** **IVS** **GSHDRT** **LKL** **WDL** 418

\*

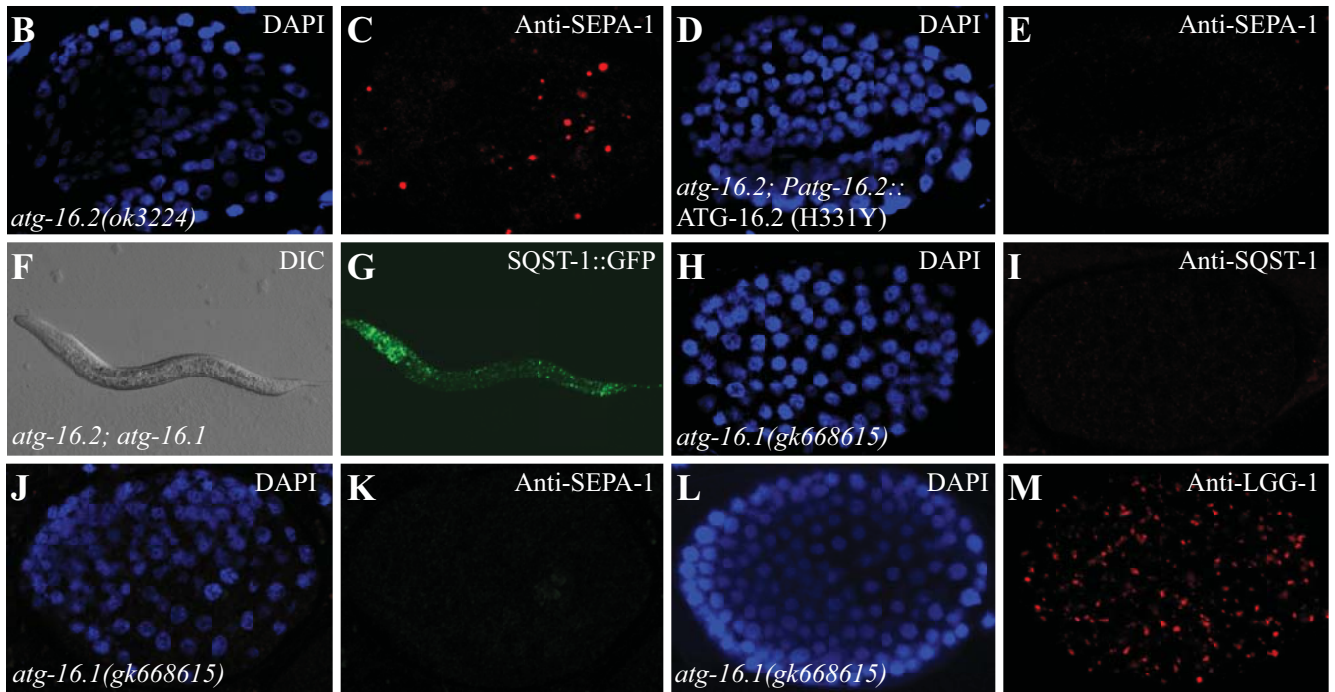

**N**

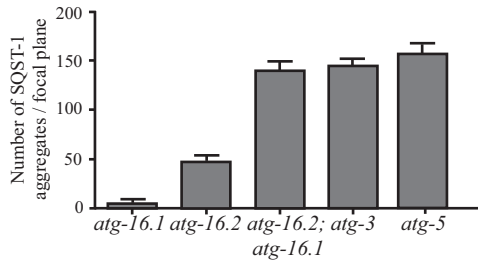

**O**

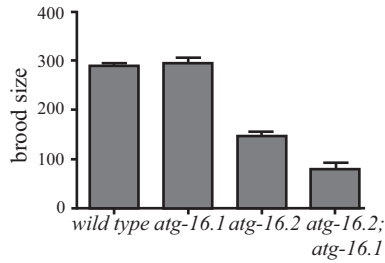

**P**

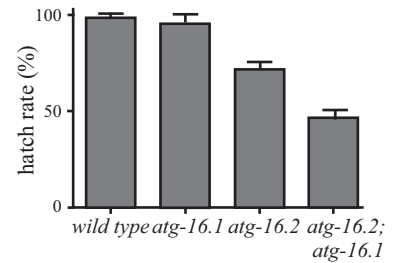

Supplemental Figure S2

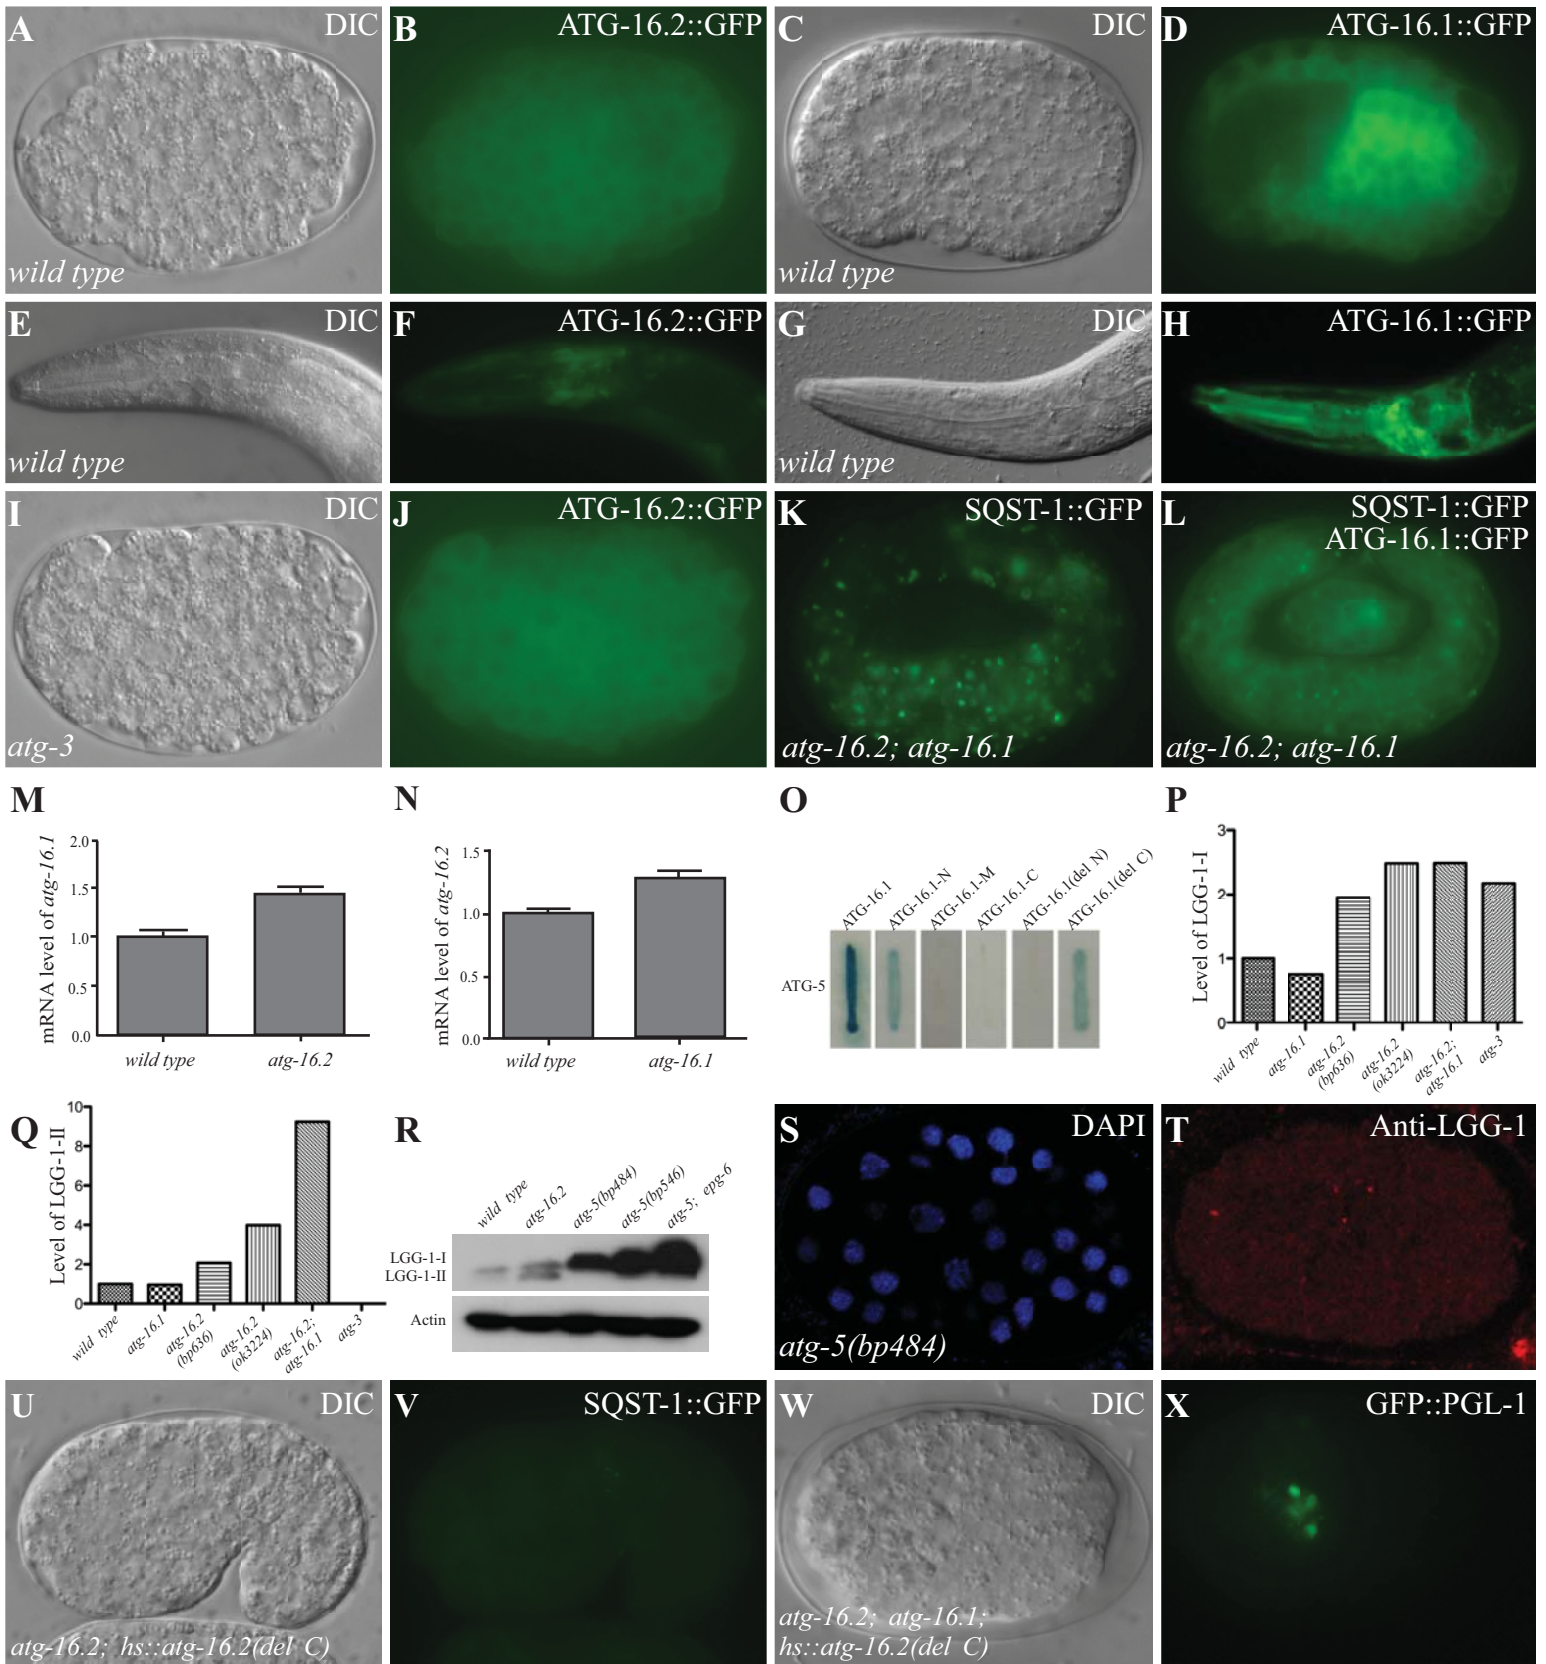

Supplemental Figure S3

## Supplemental Figure Legends 12-0684R1

### Supplemental figure legends □

**Figure S1.** Sequence alignment and phylogenetic tree of Atg16 family proteins. **(A)** Sequence alignment of Atg16 homologs. The two residues (Arg35 and Phe46) in yeast Atg16 that are critical for interaction with Atg5 are conserved in ATG-16.2 (red asterisks). The number of inserted residues in the linker region is given. Mammalian ATG16L1 and *C. elegans* ATG-16s have the WD repeats at their C termini, which is not shown here. *Hs*, *H. sapiens*; *Sc*, *S. cerevisiae*. **(B)** Phylogenetic tree of Atg16 family proteins. MEGA version 4.0 was used to construct a Neighbor-Joining phylogenetic tree. Bootstrap values are shown in percentages at nodes. The 0.1 scale bar represents 10% change.

**Figure S2.** Role of *atg-16.1* and *atg-16.2* in autophagy-regulated processes. **(A)** The histidine at amino acid 326 in ATG-16.1, which is mutated in *qx57*, is conserved in ATG-16.2 and ATG16L1. □ **(B and C)** SEPA-1 aggregates are present in an *atg-16.2* mutant embryo at the two-fold stage. **(B)** DAPI image of the embryo shown in **(C)**. □ **(D and E)** Accumulation of SEPA-1 aggregates in *atg-16.2* mutant embryos is rescued by a transgene expressing *Patg-16.2::ATG-16.2(H331Y)*, which contains a histidine to tyrosine mutation at amino acid 331 in ATG-16.2. **(D)** DAPI image of the embryo shown in **(E)**. **(F and G)** SQST-1::GFP accumulates into a large number of aggregates in *atg-16.2; atg-16.1* mutant larvae. **(F)** Nomarski image of the embryo shown in **(G)**. **(H and I)** SQST-1 aggregates are absent in *atg-16.1(gk668615)* mutant embryos at the ~100 to 200-cell stage. **(H)** DAPI image of the embryo shown in **(I)**. **(J and K)** SEPA-1 aggregates

are absent in *atg-16.1(gk668615)* mutant embryos at the comma stage, as in wild-type embryos (**Fig. 1M,N**). (**J**) DAPI image of the embryo shown in (**K**). (**L and M**) *atg-16.1(gk668615)* mutant embryos show a wild-type pattern of LGG-1 puncta (**Fig. 2B,C**) at the ~100 to 200-cell stage. (**L**) DAPI image of the embryo shown in (**M**). (**N**) Average number of SQST-1 aggregates per focal plane in various autophagy mutant embryos at the ~200-cell stage. Error bars represent the standard deviation of five confocal images. (**O**) Brood size in wild type, *atg-16.1*, *atg-16.2* and *atg-16.2; atg-16.1* animals. □(**P**) Hatch rate (% of embryos developed into larvae) in wild type, *atg-16.1*, *atg-16.2* and *atg-16.2; atg-16.1* animals.

**Figure S3.** Expression pattern of *atg-16.1* and *atg-16.2* and the requirement of *atg-5* for LGG-1 lipidation. (**A-D**) *atg-16.2::gfp* (**A, B**) and *atg-16.1::gfp* (**C, D**) are ubiquitously expressed in most, if not all, cells in embryos and are localized in the cytoplasm. (**A**) and (**C**). Nomarski images of the animals shown in (**B**) and (**D**), respectively. (**E-H**) Expression of *atg-16.2::gfp* and *atg-16.1::gfp* in the head region. (**E**) and (**G**) Nomarski images of the animals shown in (**F**) and (**H**), respectively. (**I and J**) Expression of *atg-16.2::gfp* remains unchanged in *atg-3* mutants. (**I**) Nomarski image of the embryo shown in (**J**). (**K and L**) A transgene expressing *atg-16.1::gfp* reduces the number of SQST-1 aggregates in *atg-16.2; atg-16.1* double mutants. (**M**) Quantitative real-time PCR analysis reveals that the *atg-16.1* mRNA level in *atg-16.2(ok3224)* mutants is slightly increased compared to wild-type worms. (**N**) The *atg-16.2* mRNA level is slightly increased in *atg-16.1(qx57)* mutants. □(**O**) Interaction between ATG-16.1 and ATG-5 in yeast two-hybrid analysis using an X-gal assay. □(**P and Q**) Quantification of levels of LGG-1-I and LGG-1-II shown in Fig. 2A. ImageJ was used to analyze the western blot

image and the level of LGG-1 was normalized to the actin level. □(R) Western blot analysis reveals that LGG-1-I is greatly elevated but LGG-1-II is absent in *atg-5(bp484)*, *atg-5(bp546)* and *atg-5(bp546); epg-6* mutants. (S and T) LGG-1 is diffusely localized in *atg-5(bp484)* mutants at early stage embryos. (S). DAPI image of the embryo shown in (T). □(U and V) Accumulation of SQST-1::GFP aggregates in *atg-16.2* mutant embryos (Fig. 1F) is rescued by a *Phs::atg-16.2(del C)* transgene, in which the C-terminal WD repeats are deleted. (U). Nomarski image of the embryo shown in (V). (W and X) Ectopic accumulation of GFP::PGL-1 granules in *atg-16.2; atg-16.1* mutant embryos (Fig. 1L) is rescued by a *Phs::atg-16.2(del C)* transgene. (W). Nomarski image of the embryo shown in (X).
